# Supplementary material
Source: publisher site journal article supplement (http://content.karger.com/ProdukteDB/miscArchiv/000/181/144/Suppl.pdf)
Supplement: Supplementary file 1 [file Suppl.pdf]

Table S1. YopJ-like proteins and genes (Family C55) in bacterial species.  
(For details see the MEROPS database: <http://merops.sanger.ac.uk>)

| Family C55: distribution among bacteria |                                |                     |                                                                                                                                                                                                                                                                                                                                                                                    |                                                                                    |
|-----------------------------------------|--------------------------------|---------------------|------------------------------------------------------------------------------------------------------------------------------------------------------------------------------------------------------------------------------------------------------------------------------------------------------------------------------------------------------------------------------------|------------------------------------------------------------------------------------|
| Organism                                | Counts of peptidase homologues | Acronym             | Effect                                                                                                                                                                                                                                                                                                                                                                             | Reference                                                                          |
| <a href="#">Acidovorax avenae</a>       | 2                              | HopZ2               |                                                                                                                                                                                                                                                                                                                                                                                    |                                                                                    |
| <a href="#">Aeromonas salmonicida</a>   | 1                              | AopP                | Inhibition of NF- $\kappa$ B pathway downstream of I $\kappa$ B kinase (IKK) activation. No effect on the MAPK signaling pathways.                                                                                                                                                                                                                                                 | Fehr et al., 2006                                                                  |
| <a href="#">Bartonella quintana</a>     | 1                              |                     |                                                                                                                                                                                                                                                                                                                                                                                    |                                                                                    |
| <a href="#">Bartonella tribocorum</a>   | 2                              |                     |                                                                                                                                                                                                                                                                                                                                                                                    |                                                                                    |
| <a href="#">Erwinia amylovora</a>       | 2                              |                     |                                                                                                                                                                                                                                                                                                                                                                                    |                                                                                    |
| <a href="#">Erwinia tasmaniensis</a>    | 1                              |                     |                                                                                                                                                                                                                                                                                                                                                                                    |                                                                                    |
| <a href="#">Pseudomonas amygdali</a>    | 2                              |                     |                                                                                                                                                                                                                                                                                                                                                                                    |                                                                                    |
| <a href="#">Pseudomonas savastanoi</a>  | 1                              |                     |                                                                                                                                                                                                                                                                                                                                                                                    |                                                                                    |
| <a href="#">Pseudomonas syringae</a>    | 7                              | HopZ2 (AvrPpiG1)    |                                                                                                                                                                                                                                                                                                                                                                                    | Hotson & Mudgett, 2004; Lewis et al., 2008                                         |
| <a href="#">Ralstonia solanacearum</a>  | 4                              | PopP1, PopP2, PopP3 | Effectors controlling interaction between bacteria and their plant host (so called avirulence protein)                                                                                                                                                                                                                                                                             | Lavie et al., 2002<br>Deslandes et al., 2003; Hotson & Mudgett, 2004               |
| <a href="#">Rhizobium sp. NGR234</a>    | 1                              | Y4IO                |                                                                                                                                                                                                                                                                                                                                                                                    | Hotson & Mudgett, 2004                                                             |
| <a href="#">Salmonella enterica</a>     | 1                              | AvrA homologue      |                                                                                                                                                                                                                                                                                                                                                                                    |                                                                                    |
| <a href="#">Salmonella typhimurium</a>  | 1                              | AvrA                | Acetylates specific MAPKKs and potentially inhibits c-Jun N-terminal kinase (JNK and NF $\kappa$ B signaling pathways. Alternatively, the inflammatory response is blocked by deubiquitination of I $\kappa$ B $\alpha$ and $\beta$ -catenin. In the effect the proapoptotic innate immune response to <i>Salmonella</i> is dampened and tight junction and function of intestinal | Liao et al., 2008; Jones et al., 2008; Ye et al., 2007; Collier-Hyams et al., 2002 |

|                                         |   |                              |                                                                                                        |                                                                 |
|-----------------------------------------|---|------------------------------|--------------------------------------------------------------------------------------------------------|-----------------------------------------------------------------|
|                                         |   |                              | epithelial cells is preserved.                                                                         |                                                                 |
| <a href="#">Vibrio cholerae</a>         | 1 |                              |                                                                                                        |                                                                 |
| <a href="#">Vibrio parahaemolyticus</a> | 1 | VopA                         | Inhibition of the MAPK signaling pathways but not NF-kB pathway.                                       | Trosky et al., 2004                                             |
| <a href="#">Xanthomonas campestris</a>  | 2 | AvrXv4, AvrBsT; AvrRxv, XopJ | Effectors controlling interaction between bacteria and their plant host (so called avirulence protein) | Roden et al., 2004; Hotson & Mudgett, 2004; Cunnac et al., 2007 |
| <a href="#">Y. enterocolitica</a>       | 2 |                              |                                                                                                        |                                                                 |
| <a href="#">Y. pestis</a>               | 1 | YopJ                         |                                                                                                        |                                                                 |
| <a href="#">Y. pseudotuberculosis</a>   | 1 | YopJ                         |                                                                                                        |                                                                 |

Collier-Hyams LS, Zeng H, Sun J, Tomlinson AD, Bao ZQ, Chen H, Madara JL, Orth K, Neish AS: Cutting edge: Salmonella AvrA effector inhibits the key proinflammatory, anti-apoptotic NF-kappa B pathway. *J Immunol* 2002;169:2846-2850.

Cunnac S, Wilson A, Nuwer J, Kirik A, Baranage G, Mudgett MB: A conserved carboxylesterase is a SUPPRESSOR OF AVRBS-T-ELICITED RESISTANCE in Arabidopsis. *Plant Cell* 2007;19:688-705.

Deslandes L, Olivier J, Peeters N, Feng DX, Khounlotham M, Boucher C, Somssich I, Genin S, Marco Y: Physical interaction between RRS1-R, a protein conferring resistance to bacterial wilt, and PopP2, a type III effector targeted to the plant nucleus. *Proc Natl Acad Sci USA* 2003;100:8024-8029.

Fehr D, Casanova C, Liverman A, Blazkova H, Orth K, Dobbelaere D, Frey J, Burr SE: AopP, a type III effector protein of *Aeromonas salmonicida*, inhibits the NF-kappaB signalling pathway. *Microbiology*. 2006;152:2809-2818.

Hotson A, Mudgett MB: Cysteine proteases in phytopathogenic bacteria: identification of plant targets and activation of innate immunity. *Curr Opin Plant Biol* 2004;7:384-390.

Jones RM, Wu H, Wentworth C, Luo L, Collier-Hyams L, Neish AS: Salmonella AvrA Coordinates Suppression of Host Immune and Apoptotic Defenses via JNK Pathway Blockade. *Cell Host Microbe* 2008;3:233-244.

Lavie M, Shillington E, Eguiluz C, Grimsley N, Boucher C: PopP1, a new member of the YopJ/AvrRxv family of type III effector proteins, acts as a host-specificity factor and modulates aggressiveness of *Ralstonia solanacearum*. *Mol Plant Microbe Interact* 2002;15:1058-1068.

Lewis JD, Abada W, Ma W, Guttman DS, Desveaux D: The HopZ family of *Pseudomonas syringae* type III effectors require myristoylation for virulence and avirulence functions in *Arabidopsis thaliana*. *J Bacteriol* 2008;190:2880-2891.

- Liao AP, Petrof EO, Kuppireddi S, Zhao Y, Xia Y, Claud EC, Sun J: Salmonella type III effector AvrA stabilizes cell tight junctions to inhibit inflammation in intestinal epithelial cells. *PLoS ONE* 2008;3:e2369.
- Roden J, Eardley L, Hotson A, Cao Y, Mudgett MB: Characterization of the Xanthomonas AvrXv4 effector, a SUMO protease translocated into plant cells. *Mol Plant Microbe Interact* 2004;17:633-643.
- Trosky JE, Mukherjee S, Burdette DL, Roberts M, McCarter L, Siegel RM, Orth K: Inhibition of MAPK signaling pathways by VopA from *Vibrio parahaemolyticus*. *J Biol Chem* 2004;279:51953-1957.
- Ye Z, Petrof EO, Boone D, Claud EC, Sun J: Salmonella effector AvrA regulation of colonic epithelial cell inflammation by deubiquitination. *Am J Pathol* 2007;171:882-892.

**Table S2: Bacterial species possessing functional genes encoding true SUMO isopeptidases.**

| Clan CE / Family C48: distribution among bacteria                                                   |                                |
|-----------------------------------------------------------------------------------------------------|--------------------------------|
| Organisms named in <b>bold type</b> are those for which the genomes have been completely sequenced. |                                |
| Organism                                                                                            | Counts of peptidase homologues |
| <u><a href="#">Acidovorax avenae</a></u>                                                            | 1                              |
| <u><a href="#">Bradyrhizobium japonicum</a></u>                                                     | 2                              |
| <u><a href="#">Chlamydia muridarum</a></u>                                                          | 2                              |
| <u><a href="#">Chlamydia trachomatis</a></u>                                                        | 4                              |
| <u><a href="#">Chlamydophila abortus</a></u>                                                        | 1                              |
| <u><a href="#">Chlamydophila felis</a></u>                                                          | 1                              |
| <u><a href="#">Mesorhizobium loti</a></u>                                                           | 2                              |
| <u><a href="#">Pseudomonas syringae</a></u>                                                         | 1                              |
| <u><a href="#">Rhizobium leguminosarum</a></u>                                                      | 1                              |
| <u><a href="#">Xanthomonas campestris</a></u>                                                       | 2                              |

(For details see the MEROPS database: <http://merops.sanger.ac.uk>)

**Table S3: Distribution of genes encoding YopT-like proteases among bacteria**

| Family C58: distribution among bacteria                   |                                |
|-----------------------------------------------------------|--------------------------------|
| Organism                                                  | Counts of peptidase homologues |
| <a href="#"><u><i>Acidovorax avenae</i></u></a>           | 1                              |
| <a href="#"><u><i>Bradyrhizobium japonicum</i></u></a>    | 2                              |
| <a href="#"><u><i>Haemophilus ducreyi</i></u></a>         | 2                              |
| <a href="#"><u><i>Haemophilus somnus</i></u></a>          | 1                              |
| <a href="#"><u><i>Hahella chejuensis</i></u></a>          | 1                              |
| <a href="#"><u><i>Pasteurella multocida</i></u></a>       | 2                              |
| <a href="#"><u><i>Photorhabdus luminescens</i></u></a>    | 3                              |
| <a href="#"><u><i>Pseudomonas syringae</i></u></a>        | 4                              |
| <a href="#"><u><i>Yersinia enterocolitica</i></u></a>     | 1                              |
| <a href="#"><u><i>Yersinia pestis</i></u></a>             | 1                              |
| <a href="#"><u><i>Yersinia pseudotuberculosis</i></u></a> | 1                              |

(For details see the MEROPS database: <http://merops.sanger.ac.uk>)
